# Supplementary material
Source: PubMed Central journal article supplement (PMC7939421)

## **Supplemental Digital Content**

### Hazardous Air Pollutants and Telomere Length in the Sister Study

Nicole M. Niehoff<sup>1</sup>, Marilie D. Gammon<sup>1</sup>, Alexander P. Keil<sup>1</sup>, Hazel B. Nichols<sup>1</sup>, Lawrence S. Engel<sup>1</sup>, Jack A. Taylor<sup>2,3</sup>, Alexandra J. White<sup>3</sup>, Dale P. Sandler<sup>3</sup>

**Author Affiliations:** <sup>1</sup>Department of Epidemiology, University of North Carolina, 135 Dauer Drive, Chapel Hill, NC 27599; <sup>2</sup>Epigenetic and Stem Cell Biology Laboratory, National Institute of Environmental Health Sciences, Research Triangle Park, North Carolina 27709;

<sup>3</sup>Epidemiology Branch, National Institute of Environmental Health Sciences, Research Triangle Park, North Carolina 27709

**eTable 1. Stratified regression coefficients assessing effect measure modification by BMI for the associations<sup>a</sup> between hazardous air pollutants and telomere length, The Sister Study**

| BMI (kg/m <sup>2</sup> )                  | Air toxic | N   | Stratified coefficient (95% CIs) | Interaction coefficient (95% CI) | <i>p</i> -interaction |
|-------------------------------------------|-----------|-----|----------------------------------|----------------------------------|-----------------------|
| <b><u>1,2-Dibromo-3-chloropropane</u></b> |           |     |                                  |                                  |                       |
| <25                                       | < median  | 141 | 1.00                             |                                  |                       |
|                                           | ≥ median  | 156 | 0.01 (-0.07, 0.09)               |                                  |                       |
| ≥25                                       | < median  | 223 | 1.00                             |                                  |                       |
|                                           | ≥ median  | 207 | 0.04 (-0.03, 0.10)               | 0.03 (-0.07, 0.13)               | 0.6                   |
| <b><u>1,3-butadiene</u></b>               |           |     |                                  |                                  |                       |
| <25                                       | < median  | 142 | 1.00                             |                                  |                       |
|                                           | ≥ median  | 155 | 0.05 (-0.04, 0.13)               |                                  |                       |
| ≥25                                       | < median  | 222 | 1.00                             |                                  |                       |
|                                           | ≥ median  | 208 | -0.04 (-0.11, 0.04)              | -0.08 (-0.19, 0.02)              | 0.1                   |
| <b><u>1,4-dioxane</u></b>                 |           |     |                                  |                                  |                       |
| <25                                       | < median  | 164 | 1.00                             |                                  |                       |
|                                           | ≥ median  | 125 | -0.03 (-0.11, 0.05)              |                                  |                       |
| ≥25                                       | < median  | 260 | 1.00                             |                                  |                       |
|                                           | ≥ median  | 164 | -0.03 (-0.09, 0.04)              | 0.01 (-0.10, 0.11)               | 0.9                   |
| <b><u>2,4-dinitrotoluene</u></b>          |           |     |                                  |                                  |                       |
| <25                                       | < median  | 144 | 1.00                             |                                  |                       |
|                                           | ≥ median  | 153 | 0.01 (-0.07, 0.09)               |                                  |                       |
| ≥25                                       | < median  | 220 | 1.00                             |                                  |                       |
|                                           | ≥ median  | 210 | 0.02 (-0.05, 0.08)               | 0.00 (-0.10, 0.11)               | 0.9                   |
| <b><u>2,4-toluene diisocyanate</u></b>    |           |     |                                  |                                  |                       |
| <25                                       | < median  | 153 | 1.00                             |                                  |                       |
|                                           | ≥ median  | 144 | 0.01 (-0.07, 0.09)               |                                  |                       |
| ≥25                                       | < median  | 211 | 1.00                             |                                  |                       |
|                                           | ≥ median  | 219 | -0.05 (-0.11, 0.03)              | -0.05 (-0.15, 0.06)              | 0.4                   |
| <b><u>2-chloroacetophenone</u></b>        |           |     |                                  |                                  |                       |
| <25                                       | < median  | 141 | 1.00                             |                                  |                       |
|                                           | ≥ median  | 156 | 0.03 (-0.05, 0.11)               |                                  |                       |
| ≥25                                       | < median  | 224 | 1.00                             |                                  |                       |
|                                           | ≥ median  | 204 | 0.03 (-0.03, 0.10)               | 0.00 (-0.10, 0.10)               | 1.0                   |
| <b><u>Acrylamide</u></b>                  |           |     |                                  |                                  |                       |

|                                    |          |     |                      |                     |     |
|------------------------------------|----------|-----|----------------------|---------------------|-----|
| <25                                | < median | 188 | 1.00                 |                     |     |
|                                    | ≥ median | 88  | 0.00 (-0.08, 0.09)   |                     |     |
| ≥25                                | < median | 279 | 1.00                 |                     |     |
|                                    | ≥ median | 117 | 0.06 (-0.02, 0.13)   | 0.06 (-0.06, 0.17)  | 0.3 |
| <b><u>Acrylonitrile</u></b>        |          |     |                      |                     |     |
| <25                                | < median | 154 | 1.00                 |                     |     |
|                                    | ≥ median | 143 | 0.04 (-0.04, 0.12)   |                     |     |
| ≥25                                | < median | 208 | 1.00                 |                     |     |
|                                    | ≥ median | 222 | 0.00 (-0.07, 0.06)   | -0.04 (-0.14, 0.06) | 0.4 |
| <b><u>Benzene</u></b>              |          |     |                      |                     |     |
| <25                                | < median | 148 | 1.00                 |                     |     |
|                                    | ≥ median | 149 | 0.05 (-0.03, 0.14)   |                     |     |
| ≥25                                | < median | 216 | 1.00                 |                     |     |
|                                    | ≥ median | 214 | 0.00 (-0.07, 0.08)   | -0.05 (-0.15, 0.06) | 0.4 |
| <b><u>Benzidine</u></b>            |          |     |                      |                     |     |
| <25                                | < median | 178 | 1.00                 |                     |     |
|                                    | ≥ median | 119 | -0.09 (-0.17, -0.01) |                     |     |
| ≥25                                | < median | 267 | 1.00                 |                     |     |
|                                    | ≥ median | 163 | -0.01 (-0.08, 0.06)  | 0.08 (-0.03, 0.18)  | 0.1 |
| <b><u>Carbon tetrachloride</u></b> |          |     |                      |                     |     |
| <25                                | < median | 142 | 1.00                 |                     |     |
|                                    | ≥ median | 155 | -0.04 (-0.12, 0.04)  |                     |     |
| ≥25                                | < median | 223 | 1.00                 |                     |     |
|                                    | ≥ median | 207 | 0.02 (-0.05, 0.09)   | 0.06 (-0.04, 0.17)  | 0.2 |
| <b><u>Chloroprene</u></b>          |          |     |                      |                     |     |
| <25                                | < median | 144 | 1.00                 |                     |     |
|                                    | ≥ median | 153 | -0.01 (-0.09, 0.07)  |                     |     |
| ≥25                                | < median | 221 | 1.00                 |                     |     |
|                                    | ≥ median | 209 | 0.01 (-0.06, 0.07)   | 0.02 (-0.08, 0.12)  | 0.7 |
| <b><u>Ethylbenzene</u></b>         |          |     |                      |                     |     |
| <25                                | < median | 144 | 1.00                 |                     |     |
|                                    | ≥ median | 153 | 0.08 (0.00, 0.17)    |                     |     |
| ≥25                                | < median | 220 | 1.00                 |                     |     |
|                                    | ≥ median | 210 | 0.02 (-0.05, 0.09)   | -0.06 (-0.17, 0.04) | 0.2 |
| <b><u>Ethylene dibromide</u></b>   |          |     |                      |                     |     |
| <25                                | < median | 153 | 1.00                 |                     |     |

|                                     |          |     |                     |                     |      |
|-------------------------------------|----------|-----|---------------------|---------------------|------|
| ≥25                                 | ≥ median | 144 | -0.07 (-0.15, 0.01) |                     |      |
|                                     | < median | 211 | 1.00                |                     |      |
|                                     | ≥ median | 219 | 0.02 (-0.05, 0.09)  | 0.09 (-0.01, 0.19)  | 0.08 |
| <b><u>Ethylene dichloride</u></b>   |          |     |                     |                     |      |
| <25                                 | < median | 146 | 1.00                |                     |      |
|                                     | ≥ median | 151 | -0.06 (-0.14, 0.02) |                     |      |
| ≥25                                 | < median | 217 | 1.00                |                     |      |
|                                     | ≥ median | 213 | -0.01 (-0.08, 0.05) | 0.05 (-0.06, 0.15)  | 0.4  |
| <b><u>Ethylene oxide</u></b>        |          |     |                     |                     |      |
| <25                                 | < median | 141 | 1.00                |                     |      |
|                                     | ≥ median | 156 | -0.04 (-0.12, 0.04) |                     |      |
| ≥25                                 | < median | 223 | 1.00                |                     |      |
|                                     | ≥ median | 207 | 0.02 (-0.05, 0.08)  | 0.06 (-0.05, 0.16)  | 0.3  |
| <b><u>Ethylidene dichloride</u></b> |          |     |                     |                     |      |
| <25                                 | < median | 155 | 1.00                |                     |      |
|                                     | ≥ median | 142 | 0.07 (-0.01, 0.15)  |                     |      |
| ≥25                                 | < median | 207 | 1.00                |                     |      |
|                                     | ≥ median | 223 | -0.02 (-0.09, 0.05) | -0.09 (-0.19, 0.01) | 0.08 |
| <b><u>Hydrazine</u></b>             |          |     |                     |                     |      |
| <25                                 | < median | 137 | 1.00                |                     |      |
|                                     | ≥ median | 160 | -0.02 (-0.10, 0.06) |                     |      |
| ≥25                                 | < median | 220 | 1.00                |                     |      |
|                                     | ≥ median | 210 | 0.01 (-0.06, 0.08)  | 0.03 (-0.07, 0.13)  | 0.6  |
| <b><u>Methylene chloride</u></b>    |          |     |                     |                     |      |
| <25                                 | < median | 146 | 1.00                |                     |      |
|                                     | ≥ median | 151 | 0.04 (-0.04, 0.13)  |                     |      |
| ≥25                                 | < median | 217 | 1.00                |                     |      |
|                                     | ≥ median | 213 | -0.01 (-0.08, 0.06) | -0.06 (-0.16, 0.04) | 0.3  |
| <b><u>Nitrobenzene</u></b>          |          |     |                     |                     |      |
| <25                                 | < median | 144 | 1.00                |                     |      |
|                                     | ≥ median | 153 | 0.01 (-0.07, 0.09)  |                     |      |
| ≥25                                 | < median | 221 | 1.00                |                     |      |
|                                     | ≥ median | 209 | 0.03 (-0.04, 0.09)  | 0.02 (-0.09, 0.12)  | 0.8  |
| <b><u>o-Toluidine</u></b>           |          |     |                     |                     |      |
| <25                                 | < median | 147 | 1.00                |                     |      |
|                                     | ≥ median | 150 | -0.04 (-0.12, 0.04) |                     |      |

|     |                                         |     |                     |                     |  |     |
|-----|-----------------------------------------|-----|---------------------|---------------------|--|-----|
| ≥25 | < median                                | 218 | 1.00                |                     |  |     |
|     | ≥ median                                | 212 | -0.03 (-0.10, 0.03) | 0.01 (-0.10, 0.11)  |  | 0.9 |
|     | <b><u>Polycyclic organic matter</u></b> |     |                     |                     |  |     |
| <25 | < median                                | 141 | 1.00                |                     |  |     |
|     | ≥ median                                | 156 | 0.00 (-0.08, 0.08)  |                     |  |     |
| ≥25 | < median                                | 223 | 1.00                |                     |  |     |
|     | ≥ median                                | 207 | 0.01 (-0.06, 0.07)  | 0.00 (-0.10, 0.10)  |  | 1.0 |
|     | <b><u>Propylene dichloride</u></b>      |     |                     |                     |  |     |
| <25 | < median                                | 143 | 1.00                |                     |  |     |
|     | ≥ median                                | 154 | -0.03 (-0.11, 0.05) |                     |  |     |
| ≥25 | < median                                | 221 | 1.00                |                     |  |     |
|     | ≥ median                                | 209 | -0.02 (-0.08, 0.05) | 0.01 (-0.09, 0.11)  |  | 0.8 |
|     | <b><u>Propylene oxide</u></b>           |     |                     |                     |  |     |
| <25 | < median                                | 146 | 1.00                |                     |  |     |
|     | ≥ median                                | 151 | -0.05 (-0.13, 0.03) |                     |  |     |
| ≥25 | < median                                | 219 | 1.00                |                     |  |     |
|     | ≥ median                                | 211 | 0.02 (-0.05, 0.09)  | 0.07 (-0.03, 0.18)  |  | 0.2 |
|     | <b><u>Styrene</u></b>                   |     |                     |                     |  |     |
| <25 | < median                                | 141 | 1.00                |                     |  |     |
|     | ≥ median                                | 156 | 0.04 (-0.04, 0.13)  |                     |  |     |
| ≥25 | < median                                | 222 | 1.00                |                     |  |     |
|     | ≥ median                                | 208 | -0.04 (-0.11, 0.03) | -0.08 (-0.19, 0.02) |  | 0.1 |
|     | <b><u>Toluene</u></b>                   |     |                     |                     |  |     |
| <25 | < median                                | 142 | 1.00                |                     |  |     |
|     | ≥ median                                | 155 | 0.08 (-0.01, 0.17)  |                     |  |     |
| ≥25 | < median                                | 221 | 1.00                |                     |  |     |
|     | ≥ median                                | 209 | 0.01 (-0.06, 0.08)  | -0.07 (-0.17, 0.03) |  | 0.2 |
|     | <b><u>Vinyl chloride</u></b>            |     |                     |                     |  |     |
| <25 | < median                                | 154 | 1.00                |                     |  |     |
|     | ≥ median                                | 143 | 0.05 (-0.02, 0.14)  |                     |  |     |
| ≥25 | < median                                | 208 | 1.00                |                     |  |     |
|     | ≥ median                                | 222 | -0.01 (-0.08, 0.06) | -0.07 (-0.17, 0.03) |  | 0.2 |
|     | <b><u>Vinylidene chloride</u></b>       |     |                     |                     |  |     |
| <25 | < median                                | 148 | 1.00                |                     |  |     |
|     | ≥ median                                | 149 | 0.04 (-0.04, 0.12)  |                     |  |     |
| ≥25 | < median                                | 217 | 1.00                |                     |  |     |

|     |                       |     |                     |                     |     |
|-----|-----------------------|-----|---------------------|---------------------|-----|
|     | ≥ median              | 213 | -0.02 (-0.09, 0.05) | -0.06 (-0.16, 0.04) | 0.3 |
|     | <b><u>Xylenes</u></b> |     |                     |                     |     |
| <25 | < median              | 143 | 1.00                |                     |     |
|     | ≥ median              | 154 | 0.06 (-0.03, 0.14)  |                     |     |
| ≥25 | < median              | 221 | 1.00                |                     |     |
|     | ≥ median              | 209 | 0.04 (-0.03, 0.11)  | -0.02 (-0.12, 0.08) | 0.7 |

Abbreviations: BMI, body mass index; CIs, confidence intervals

<sup>a</sup>Models adjusted for age, race, residence type, education, and smoking status

**eTable 2. Stratified regression coefficients assessing effect measure modification by physical activity for the associations between hazardous air pollutants and telomere length, The Sister Study**

| PA (hours per week)                       | Air toxic | N   | Stratified coefficient (95% CIs) | Interaction coefficient (95% CI) | <i>p</i> -interaction |
|-------------------------------------------|-----------|-----|----------------------------------|----------------------------------|-----------------------|
| <b><u>1,2-Dibromo-3-chloropropane</u></b> |           |     |                                  |                                  |                       |
| ≤ median                                  | < median  | 174 | 1.00                             |                                  |                       |
|                                           | ≥ median  | 190 | 0.05 (-0.02, 0.12)               |                                  |                       |
| > median                                  | < median  | 190 | 1.00                             |                                  |                       |
|                                           | ≥ median  | 174 | 0.01 (-0.06, 0.08)               | -0.03 (-0.13, 0.07)              | 0.5                   |
| <b><u>1,3-butadiene</u></b>               |           |     |                                  |                                  |                       |
| ≤ median                                  | < median  | 180 | 1.00                             |                                  |                       |
|                                           | ≥ median  | 184 | -0.04 (-0.12, 0.04)              |                                  |                       |
| > median                                  | < median  | 184 | 1.00                             |                                  |                       |
|                                           | ≥ median  | 180 | 0.04 (-0.04, 0.12)               | 0.08 (-0.02, 0.18)               | 0.1                   |
| <b><u>1,4-dioxane</u></b>                 |           |     |                                  |                                  |                       |
| ≤ median                                  | < median  | 228 | 1.00                             |                                  |                       |
|                                           | ≥ median  | 131 | 0.00 (-0.08, 0.07)               |                                  |                       |
| > median                                  | < median  | 197 | 1.00                             |                                  |                       |
|                                           | ≥ median  | 158 | -0.07 (-0.14, 0.01)              | -0.06 (-0.16, 0.04)              | 0.2                   |
| <b><u>2,4-dinitrotoluene</u></b>          |           |     |                                  |                                  |                       |
| ≤ median                                  | < median  | 174 | 1.00                             |                                  |                       |
|                                           | ≥ median  | 190 | 0.00 (-0.07, 0.07)               |                                  |                       |
| > median                                  | < median  | 190 | 1.00                             |                                  |                       |
|                                           | ≥ median  | 174 | 0.04 (-0.03, 0.11)               | 0.04 (-0.06, 0.14)               | 0.5                   |
| <b><u>2,4-toluene diisocyanate</u></b>    |           |     |                                  |                                  |                       |
| ≤ median                                  | < median  | 193 | 1.00                             |                                  |                       |
|                                           | ≥ median  | 171 | -0.03 (-0.10, 0.05)              |                                  |                       |
| > median                                  | < median  | 171 | 1.00                             |                                  |                       |
|                                           | ≥ median  | 193 | -0.01 (-0.09, 0.06)              | 0.02 (-0.08, 0.12)               | 0.8                   |
| <b><u>2-chloroacetophenone</u></b>        |           |     |                                  |                                  |                       |
| ≤ median                                  | < median  | 171 | 1.00                             |                                  |                       |
|                                           | ≥ median  | 193 | 0.07 (0.00, 0.14)                |                                  |                       |
| > median                                  | < median  | 194 | 1.00                             |                                  |                       |
|                                           | ≥ median  | 168 | 0.01 (-0.06, 0.08)               | -0.06 (-0.16, 0.04)              | 0.2                   |
| <b><u>Acrylamide</u></b>                  |           |     |                                  |                                  |                       |

|                                    |          |     |                     |                     |  |      |
|------------------------------------|----------|-----|---------------------|---------------------|--|------|
| ≤ median                           | < median | 234 | 1.00                |                     |  |      |
|                                    | ≥ median | 97  | 0.01 (-0.07, 0.09)  |                     |  |      |
| > median                           | < median | 234 | 1.00                |                     |  |      |
|                                    | ≥ median | 108 | 0.06 (-0.02, 0.14)  | 0.05 (-0.06, 0.16)  |  | 0.4  |
| <b><u>Acrylonitrile</u></b>        |          |     |                     |                     |  |      |
| ≤ median                           | < median | 188 | 1.00                |                     |  |      |
|                                    | ≥ median | 176 | 0.01 (-0.06, 0.08)  |                     |  |      |
| > median                           | < median | 175 | 1.00                |                     |  |      |
|                                    | ≥ median | 189 | 0.02 (-0.05, 0.09)  | 0.01 (-0.09, 0.11)  |  | 0.8  |
| <b><u>Benzene</u></b>              |          |     |                     |                     |  |      |
| ≤ median                           | < median | 184 | 1.00                |                     |  |      |
|                                    | ≥ median | 180 | -0.02 (-0.10, 0.05) |                     |  |      |
| > median                           | < median | 181 | 1.00                |                     |  |      |
|                                    | ≥ median | 183 | 0.07 (-0.01, 0.15)  | 0.09 (0.00, 0.19)   |  | 0.06 |
| <b><u>Benzidine</u></b>            |          |     |                     |                     |  |      |
| ≤ median                           | < median | 219 | 1.00                |                     |  |      |
|                                    | ≥ median | 145 | -0.01 (-0.08, 0.07) |                     |  |      |
| > median                           | < median | 227 | 1.00                |                     |  |      |
|                                    | ≥ median | 137 | -0.07 (-0.14, 0.00) | -0.07 (-0.17, 0.04) |  | 0.2  |
| <b><u>Carbon tetrachloride</u></b> |          |     |                     |                     |  |      |
| ≤ median                           | < median | 179 | 1.00                |                     |  |      |
|                                    | ≥ median | 185 | -0.01 (-0.08, 0.07) |                     |  |      |
| > median                           | < median | 186 | 1.00                |                     |  |      |
|                                    | ≥ median | 178 | 0.00 (-0.07, 0.07)  | 0.01 (-0.09, 0.11)  |  | 0.9  |
| <b><u>Chloroprene</u></b>          |          |     |                     |                     |  |      |
| ≤ median                           | < median | 169 | 1.00                |                     |  |      |
|                                    | ≥ median | 195 | -0.01 (-0.08, 0.07) |                     |  |      |
| > median                           | < median | 196 | 1.00                |                     |  |      |
|                                    | ≥ median | 168 | 0.02 (-0.06, 0.09)  | 0.02 (-0.08, 0.12)  |  | 0.7  |
| <b><u>Ethylbenzene</u></b>         |          |     |                     |                     |  |      |
| ≤ median                           | < median | 182 | 1.00                |                     |  |      |
|                                    | ≥ median | 182 | 0.00 (-0.07, 0.08)  |                     |  |      |
| > median                           | < median | 182 | 1.00                |                     |  |      |
|                                    | ≥ median | 182 | 0.10 (0.02, 0.17)   | 0.09 (-0.01, 0.19)  |  | 0.07 |
| <b><u>Ethylene dibromide</u></b>   |          |     |                     |                     |  |      |
| ≤ median                           | < median | 175 | 1.00                |                     |  |      |



|                                     |          |     |                     |                     |     |
|-------------------------------------|----------|-----|---------------------|---------------------|-----|
|                                     | ≥ median | 189 | 0.02 (-0.05, 0.09)  |                     |     |
| > median                            | < median | 190 | 1.00                |                     |     |
|                                     | ≥ median | 174 | -0.05 (-0.12, 0.02) | -0.07 (-0.17, 0.04) | 0.2 |
| <b><u>Ethylene dichloride</u></b>   |          |     |                     |                     |     |
| ≤ median                            | < median | 183 | 1.00                |                     |     |
|                                     | ≥ median | 181 | -0.03 (-0.11, 0.04) |                     |     |
| > median                            | < median | 181 | 1.00                |                     |     |
|                                     | ≥ median | 183 | -0.03 (-0.10, 0.05) | 0.01 (-0.09, 0.11)  | 0.9 |
| <b><u>Ethylene oxide</u></b>        |          |     |                     |                     |     |
| ≤ median                            | < median | 176 | 1.00                |                     |     |
|                                     | ≥ median | 188 | 0.00 (-0.07, 0.07)  |                     |     |
| > median                            | < median | 189 | 1.00                |                     |     |
|                                     | ≥ median | 175 | -0.01 (-0.08, 0.07) | -0.01 (-0.11, 0.09) | 0.9 |
| <b><u>Ethylidene dichloride</u></b> |          |     |                     |                     |     |
| ≤ median                            | < median | 189 | 1.00                |                     |     |
|                                     | ≥ median | 175 | 0.05 (-0.02, 0.12)  |                     |     |
| > median                            | < median | 173 | 1.00                |                     |     |
|                                     | ≥ median | 191 | -0.02 (-0.09, 0.05) | -0.07 (-0.17, 0.03) | 0.1 |
| <b><u>Hydrazine</u></b>             |          |     |                     |                     |     |
| ≤ median                            | < median | 181 | 1.00                |                     |     |
|                                     | ≥ median | 183 | -0.02 (-0.09, 0.05) |                     |     |
| > median                            | < median | 177 | 1.00                |                     |     |
|                                     | ≥ median | 187 | 0.02 (-0.05, 0.09)  | 0.04 (-0.06, 0.14)  | 0.4 |
| <b><u>Methylene chloride</u></b>    |          |     |                     |                     |     |
| ≤ median                            | < median | 178 | 1.00                |                     |     |
|                                     | ≥ median | 186 | 0.00 (-0.08, 0.07)  |                     |     |
| > median                            | < median | 186 | 1.00                |                     |     |
|                                     | ≥ median | 178 | 0.03 (-0.05, 0.10)  | 0.03 (-0.07, 0.13)  | 0.6 |
| <b><u>Nitrobenzene</u></b>          |          |     |                     |                     |     |
| ≤ median                            | < median | 171 | 1.00                |                     |     |
|                                     | ≥ median | 193 | 0.01 (-0.06, 0.08)  |                     |     |
| > median                            | < median | 194 | 1.00                |                     |     |
|                                     | ≥ median | 170 | 0.04 (-0.03, 0.11)  | 0.03 (-0.07, 0.13)  | 0.5 |
| <b><u>o-Toluidine</u></b>           |          |     |                     |                     |     |
| ≤ median                            | < median | 177 | 1.00                |                     |     |
|                                     | ≥ median | 187 | -0.04 (-0.11, 0.03) |                     |     |

|                                         |          |     |                     |                     |  |      |
|-----------------------------------------|----------|-----|---------------------|---------------------|--|------|
| > median                                | < median | 189 | 1.00                |                     |  |      |
|                                         | ≥ median | 175 | -0.02 (-0.10, 0.05) | 0.02 (-0.08, 0.12)  |  | 0.7  |
| <b><u>Polycyclic organic matter</u></b> |          |     |                     |                     |  |      |
| ≤ median                                | < median | 189 | 1.00                |                     |  |      |
|                                         | ≥ median | 175 | -0.03 (-0.10, 0.04) |                     |  |      |
| > median                                | < median | 176 | 1.00                |                     |  |      |
|                                         | ≥ median | 188 | 0.04 (-0.04, 0.11)  | 0.07 (-0.03, 0.16)  |  | 0.2  |
| <b><u>Propylene dichloride</u></b>      |          |     |                     |                     |  |      |
| ≤ median                                | < median | 183 | 1.00                |                     |  |      |
|                                         | ≥ median | 181 | -0.02 (-0.09, 0.05) |                     |  |      |
| > median                                | < median | 182 | 1.00                |                     |  |      |
|                                         | ≥ median | 182 | -0.02 (-0.09, 0.05) | 0.00 (-0.10, 0.10)  |  | 1.0  |
| <b><u>Propylene oxide</u></b>           |          |     |                     |                     |  |      |
| ≤ median                                | < median | 178 | 1.00                |                     |  |      |
|                                         | ≥ median | 186 | -0.03 (-0.10, 0.05) |                     |  |      |
| > median                                | < median | 187 | 1.00                |                     |  |      |
|                                         | ≥ median | 177 | 0.01 (-0.06, 0.09)  | 0.04 (-0.06, 0.14)  |  | 0.4  |
| <b><u>Styrene</u></b>                   |          |     |                     |                     |  |      |
| ≤ median                                | < median | 189 | 1.00                |                     |  |      |
|                                         | ≥ median | 175 | -0.02 (-0.09, 0.06) |                     |  |      |
| > median                                | < median | 174 | 1.00                |                     |  |      |
|                                         | ≥ median | 190 | 0.00 (-0.08, 0.08)  | 0.02 (-0.08, 0.12)  |  | 0.8  |
| <b><u>Toluene</u></b>                   |          |     |                     |                     |  |      |
| ≤ median                                | < median | 179 | 1.00                |                     |  |      |
|                                         | ≥ median | 185 | -0.01 (-0.09, 0.07) |                     |  |      |
| > median                                | < median | 185 | 1.00                |                     |  |      |
|                                         | ≥ median | 179 | 0.09 (0.01, 0.17)   | 0.10 (0.00, 0.20)   |  | 0.04 |
| <b><u>Vinyl chloride</u></b>            |          |     |                     |                     |  |      |
| ≤ median                                | < median | 192 | 1.00                |                     |  |      |
|                                         | ≥ median | 172 | 0.03 (-0.04, 0.10)  |                     |  |      |
| > median                                | < median | 171 | 1.00                |                     |  |      |
|                                         | ≥ median | 193 | 0.00 (-0.07, 0.07)  | -0.03 (-0.13, 0.07) |  | 0.6  |
| <b><u>Vinylidene chloride</u></b>       |          |     |                     |                     |  |      |
| ≤ median                                | < median | 176 | 1.00                |                     |  |      |
|                                         | ≥ median | 188 | 0.00 (-0.07, 0.08)  |                     |  |      |
| > median                                | < median | 189 | 1.00                |                     |  |      |

|               |                       |     |                    |                    |      |
|---------------|-----------------------|-----|--------------------|--------------------|------|
|               | $\geq$ median         | 175 | 0.01 (-0.06, 0.09) | 0.01 (-0.09, 0.11) | 0.9  |
|               | <b><u>Xylenes</u></b> |     |                    |                    |      |
| $\leq$ median | < median              | 180 | 1.00               |                    |      |
|               | $\geq$ median         | 184 | 0.01 (-0.07, 0.09) |                    |      |
| > median      | < median              | 184 | 1.00               |                    |      |
|               | $\geq$ median         | 180 | 0.09 (0.02, 0.17)  | 0.09 (-0.01, 0.19) | 0.09 |

---

Abbreviations: PA, physical activity; CIs, confidence intervals

Models adjusted for age, race, residence type, education, and smoking status

eFigure1. Plots of T/S ratio values against (a) 1,4-dioxane and (b) benzidine concentrations

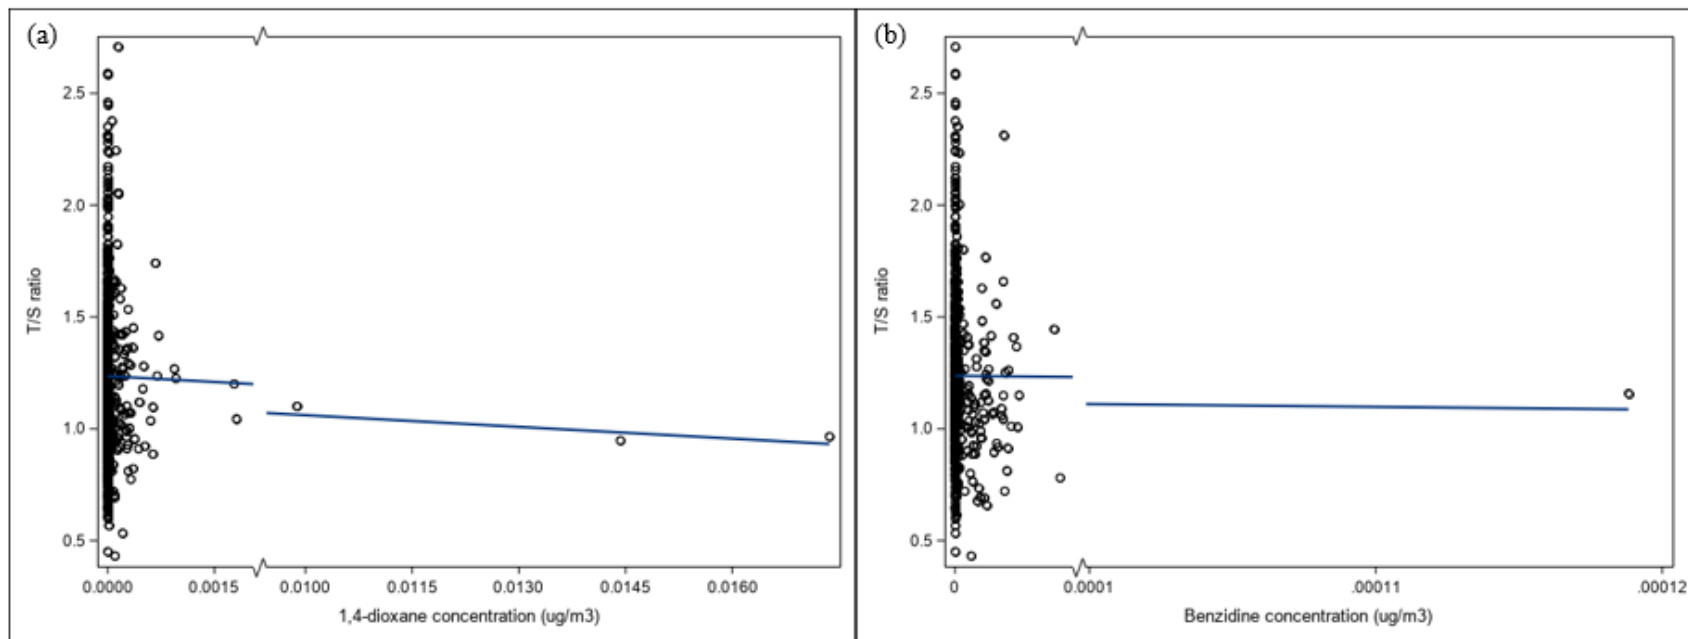

Supplement: ee9-3-e053-s001.pdf [file ee9-3-e053-s001.pdf]
